# Supplementary material for: The long non-coding RNA TAZ-AS202 promotes lung cancer progression via regulation of the E2F1 transcription factor and activation of Ephrin signaling
Source: Springer Nature journal article supplement (doi:10.1038/s41419-023-06277-y), 2023-11-18

Figure 1D

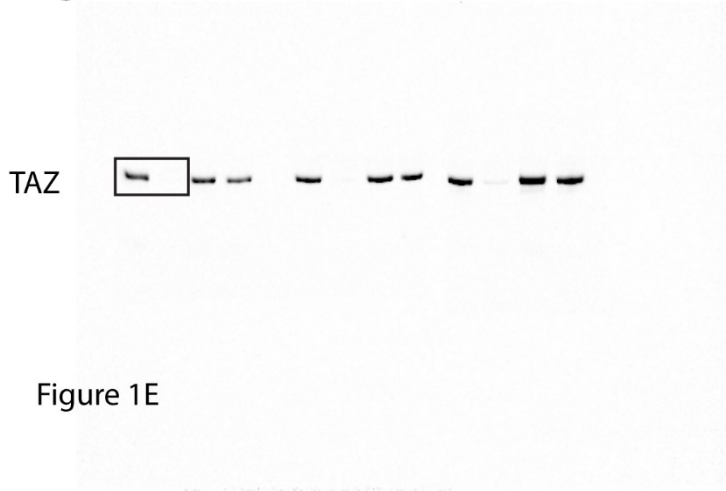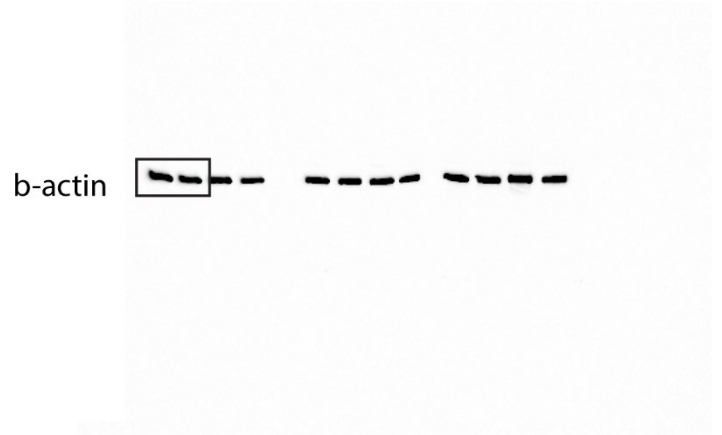

Figure 1E

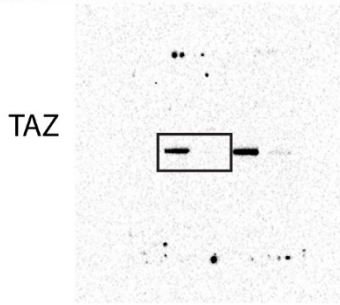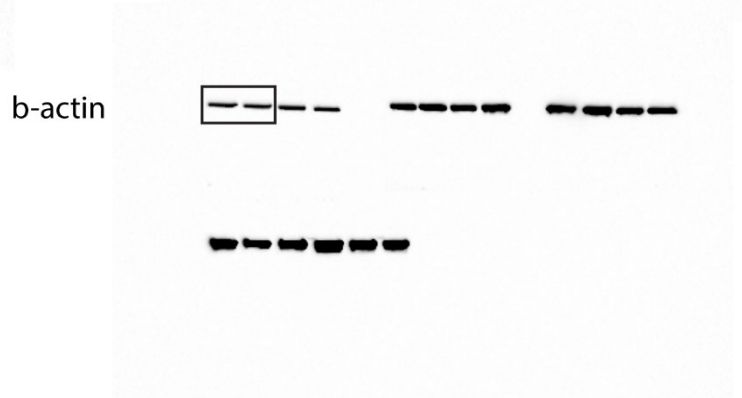

Figure 2F

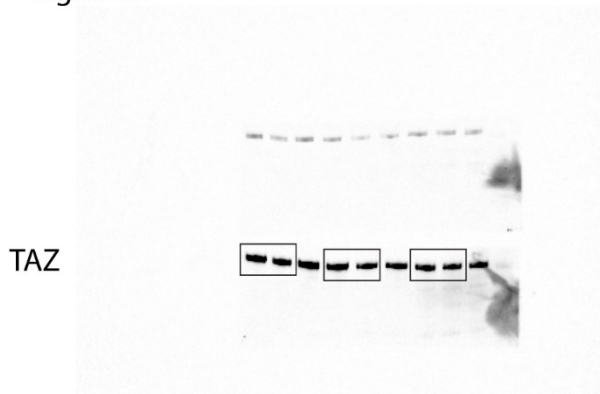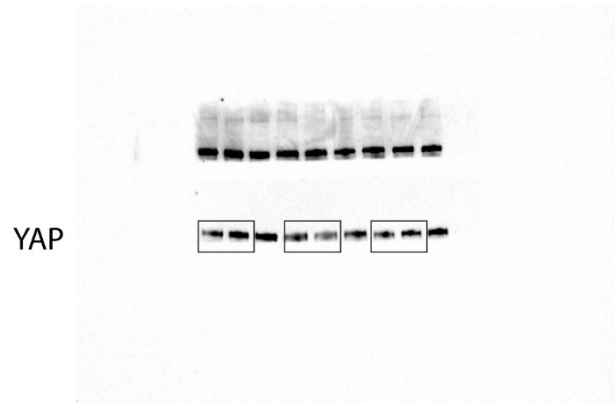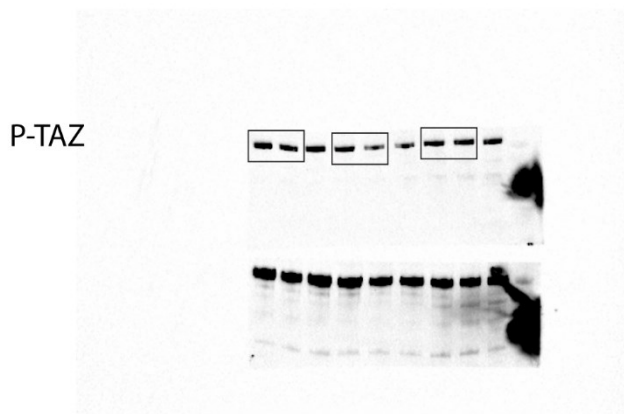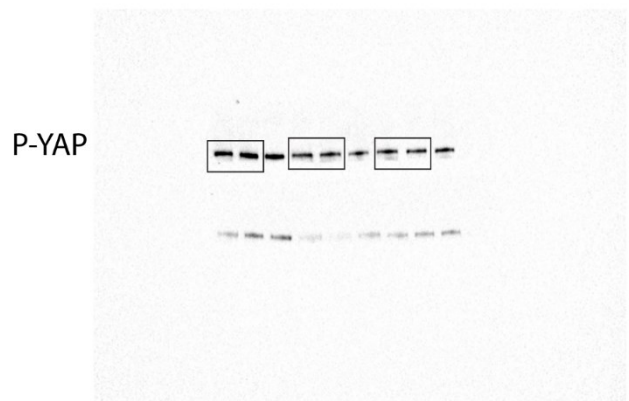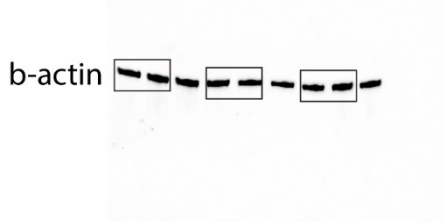

Figure 2G

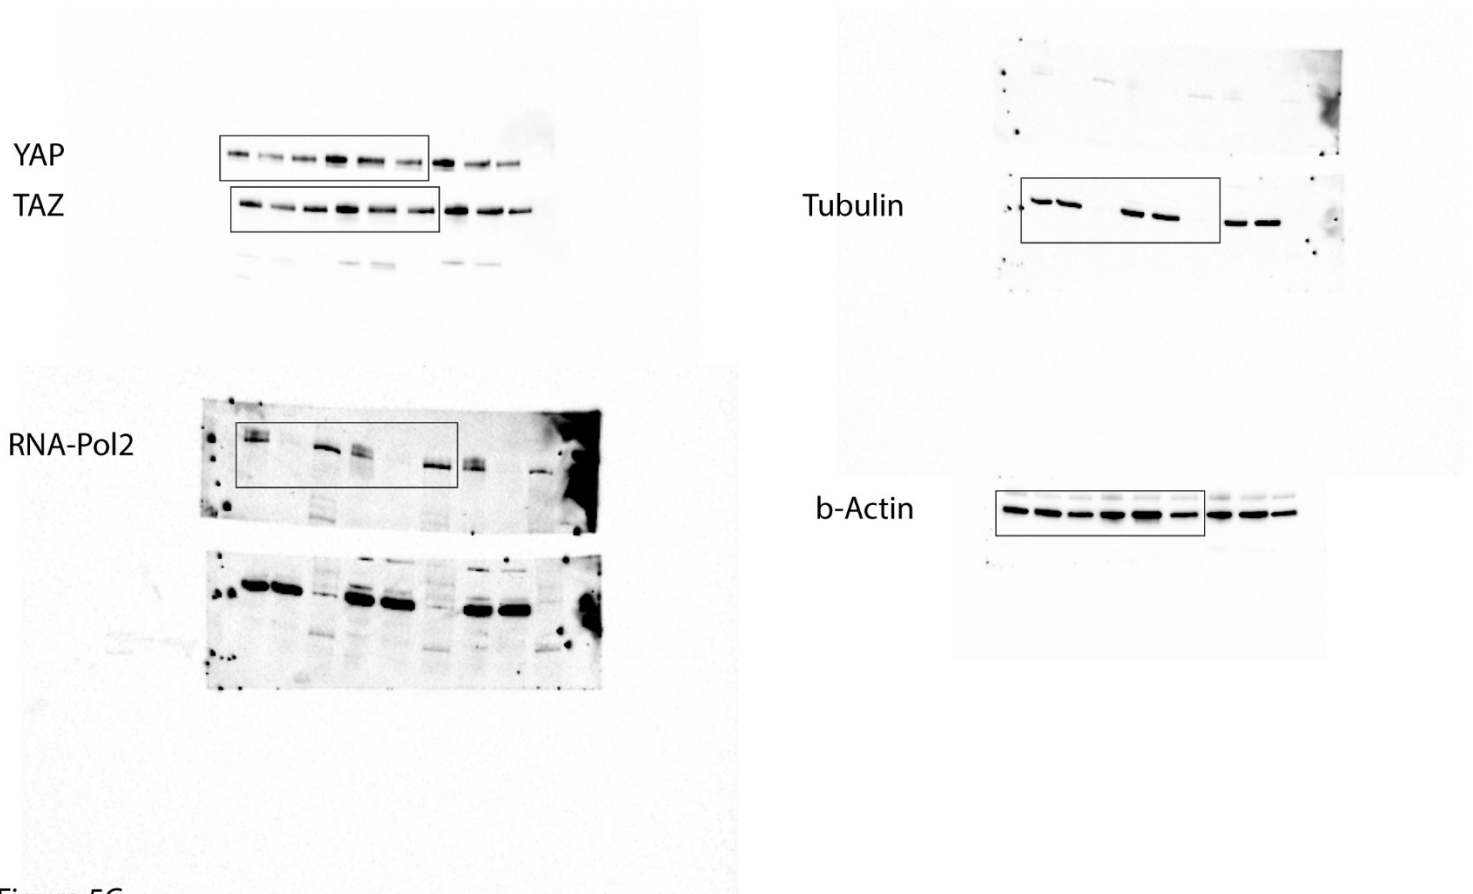

Figure 5C

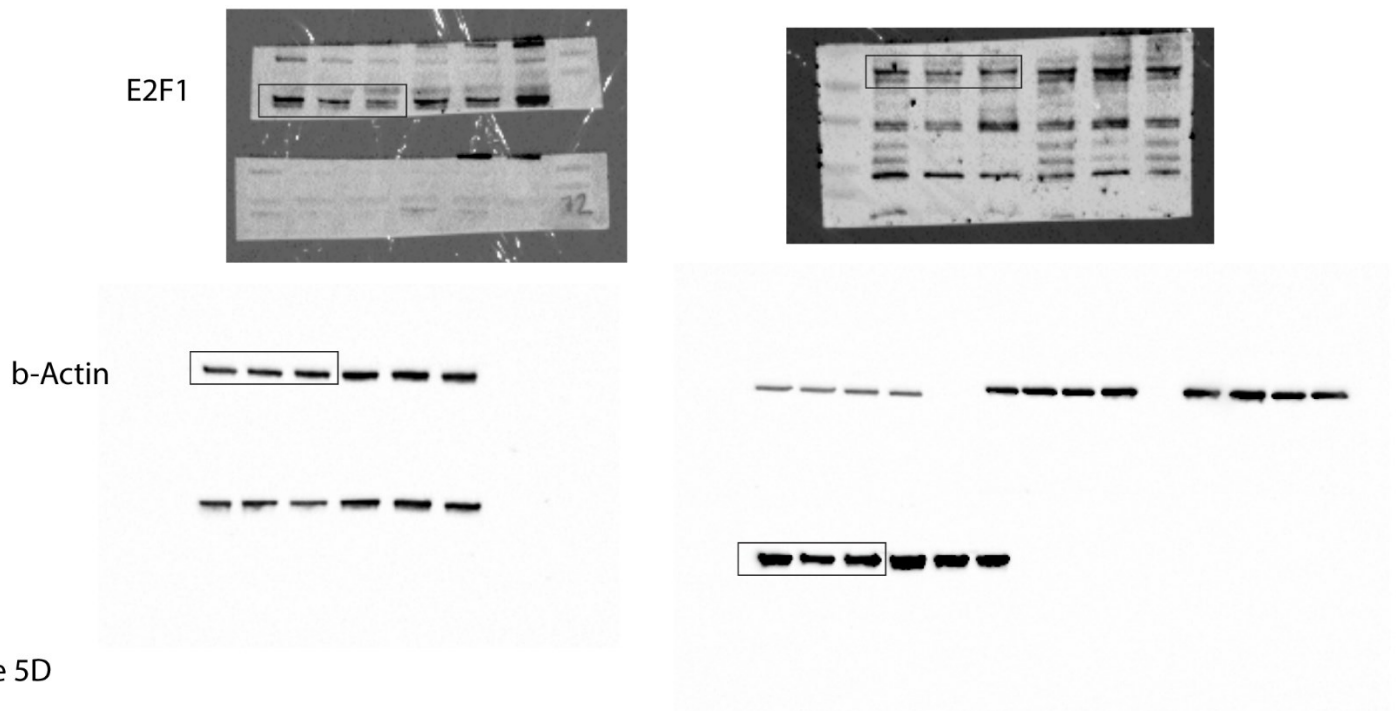

Figure 5D

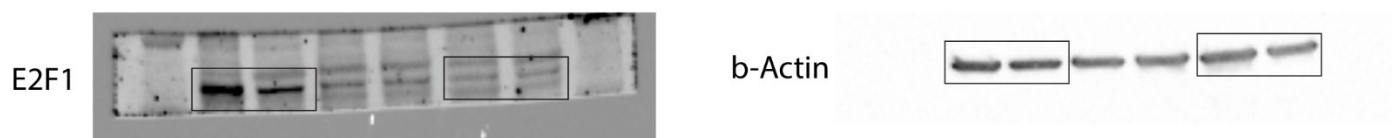

Figure 6A

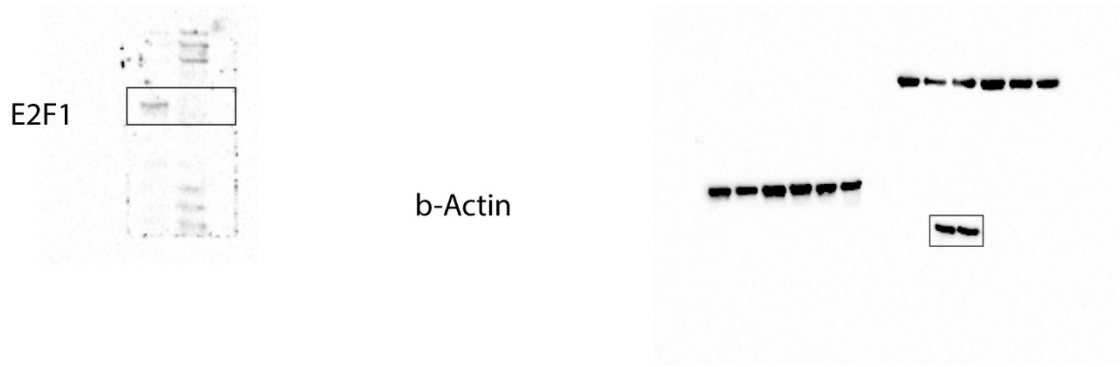

Figure 6B

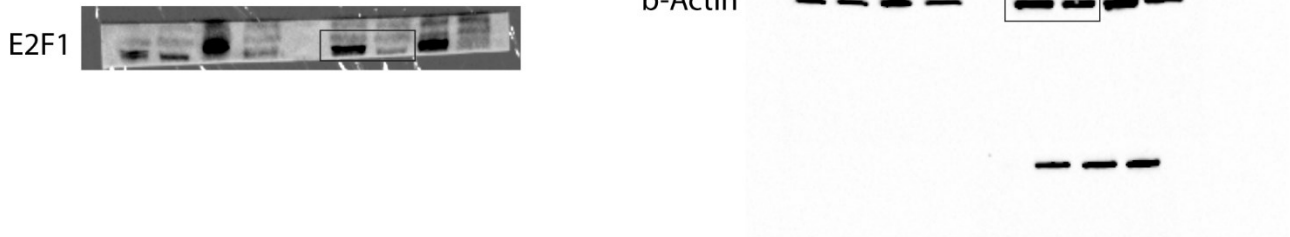

Figure 7A

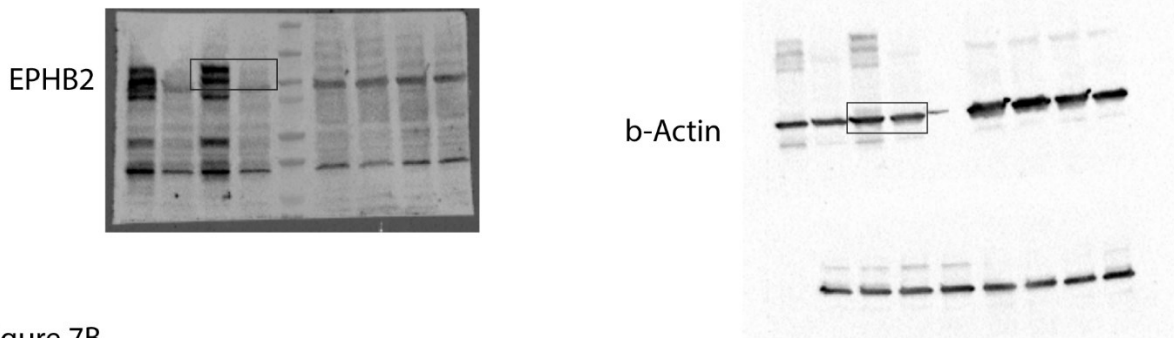

Figure 7B

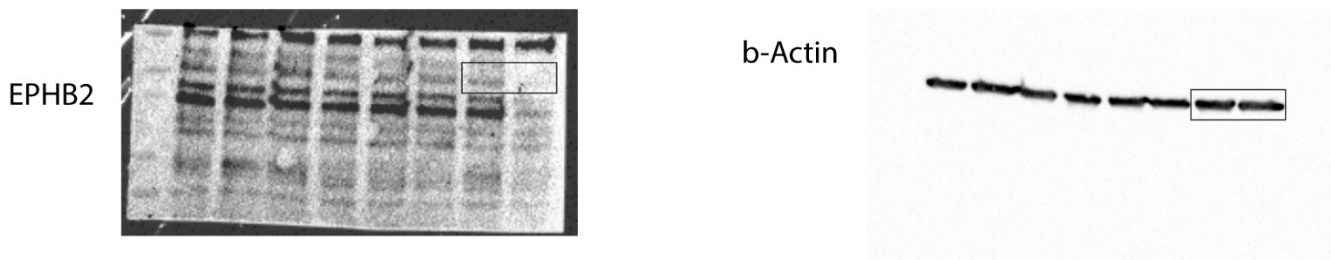

Supplementary Figure 2A

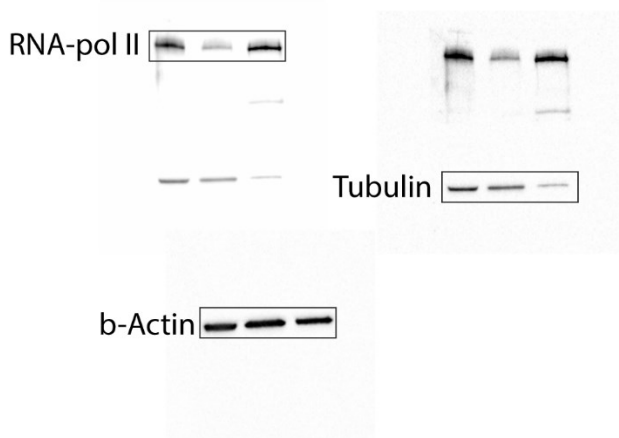

Supplementary Figure 2B

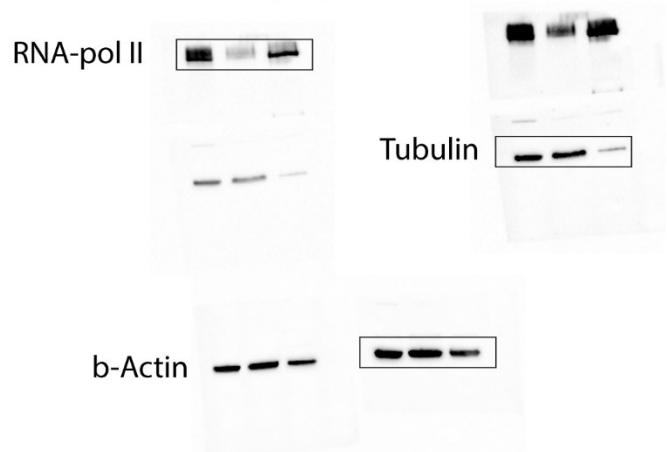

Supplementary Figure 3A

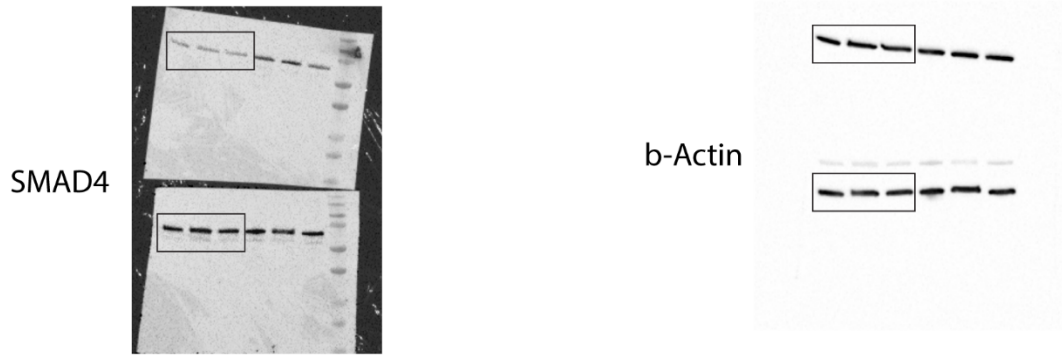

Supplementary Figure 3B

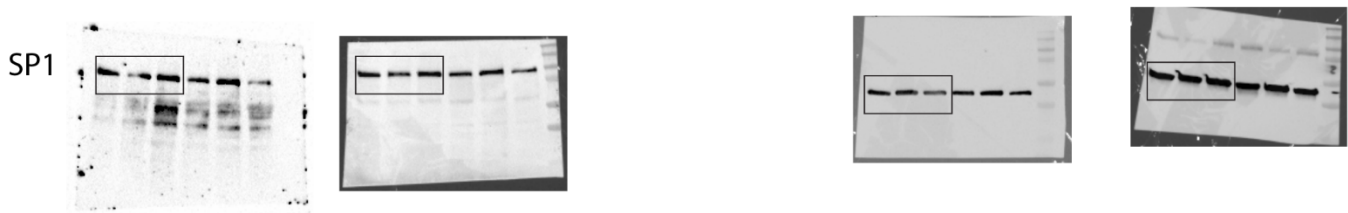

Supplementary Figure 3C

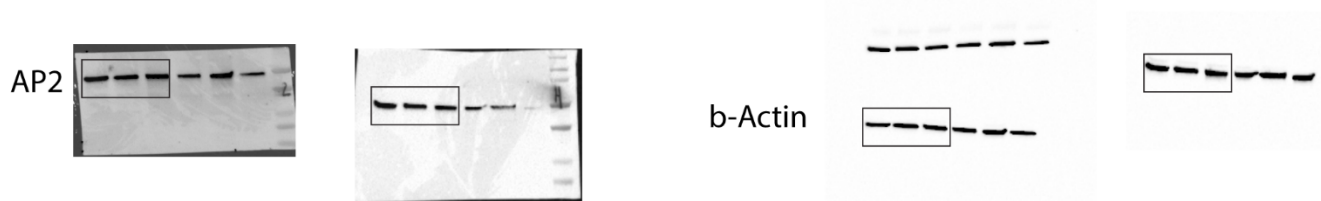

Supplementary Figure 3D

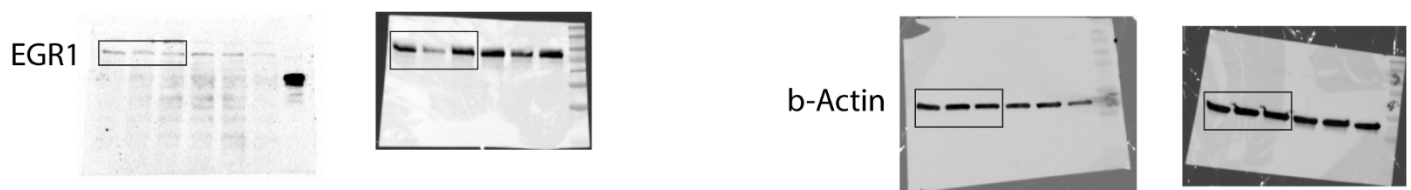

Supplementary Figure 3E

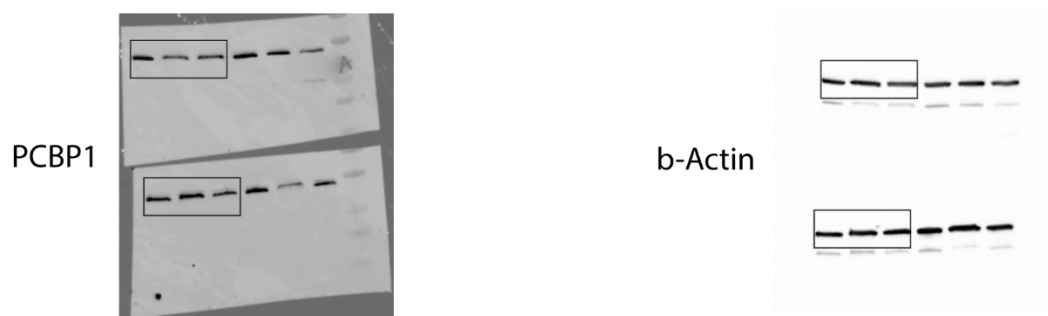

Supplement: MOESM4 [file 41419_2023_6277_MOESM4_ESM.pdf]
